# Supplementary material
Source: publisher figshare collection journal article supplement (https://frontiersin.figshare.com/ndownloader/files/14055281)
Supplement: Supplementary file [file 14055281]

# Action potential prolongation, $\beta$ -adrenergic stimulation and angiotensin II as co-factors in sarcoplasmic reticulum instability

Carlotta Ronchi et al.

## SUPPLEMENTAL FIGURES

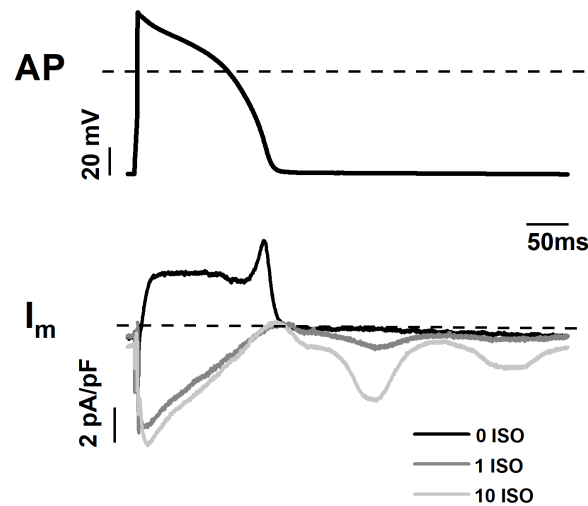

**Figure S1: [ISO]-dependency effect on  $I_{T1}$  occurrence.** Examples of Normal AP waveform used as a command in AP clamp (top) and the corresponding  $I_m$  (bottom) in basal condition and under ISO exposure.

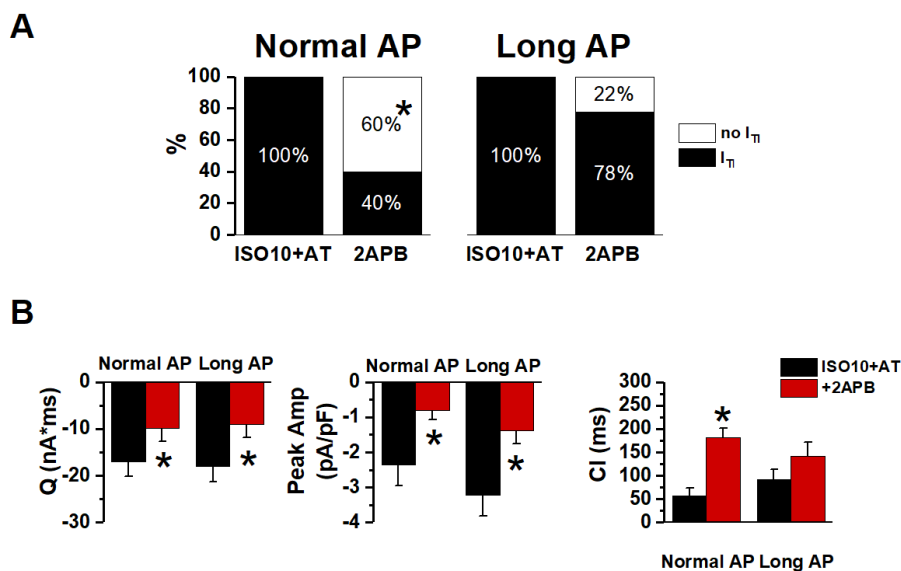

**Figure S2: 2APB effect on  $I_{T1}$  evoked by ISO10+AT within same CMs.** (A)  $I_{T1}$  incidence in ISO10+AT alone and with 2APB. (B) statistic (mean  $\pm$  S.E.) of  $I_{T1}$  charge (Q); peak  $I_{T1}$  amplitude (Peak Amp) and coupling interval (CI). Normal AP N=10, Long AP N=9. \*  $p > 0.05$  vs ISO10+AT.

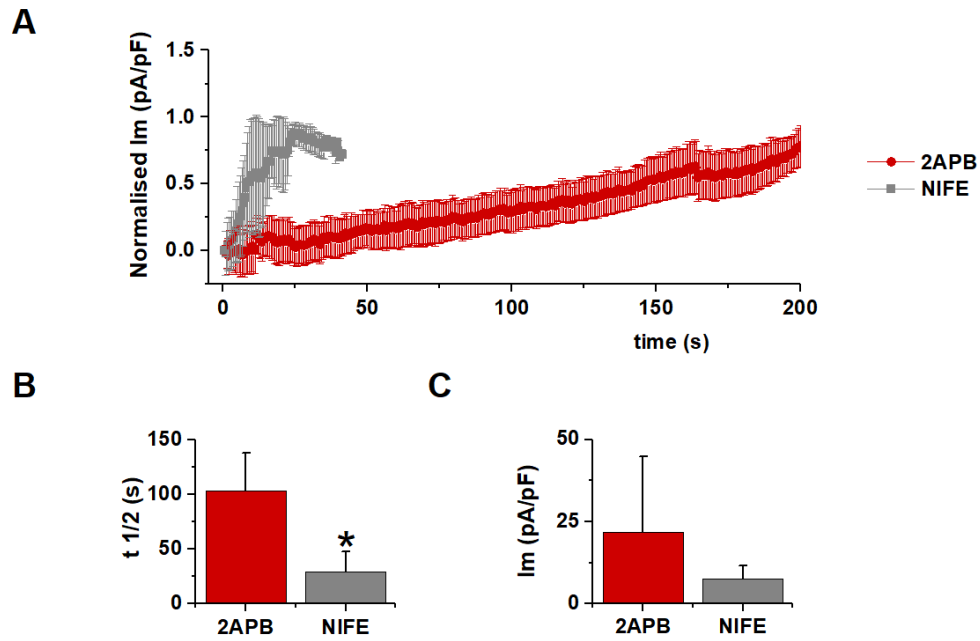

**FigureS3: 2APB and NIFE effect on  $I_m$  during AP plateau phase under 10nM ISO exposure.** (A) Time course of means  $\pm$  S.E. of normalized  $I_m$  values during AP plateau phase in the presence of 2APB (red) or NIFE (grey). (B) Time for half-maximal effect of 2APB and NIFE. (C) Maximal effect of 2APB and NIFE on  $I_m$ . 2APB N=6, NIFE N=5. \*  $p > 0.05$  vs 2APB

|                        | Long AP  | Normal AP | Short AP |
|------------------------|----------|-----------|----------|
| $E_{diast}$ (mV)       | -80.1103 | -80.354   | -80.5857 |
| PA (mV)                | 47.8344  | 46.83809  | 53.33333 |
| APD <sub>20</sub> (ms) | 72.6823  | 61.297    | 37.41788 |
| APD <sub>50</sub> (ms) | 151.467  | 119.801   | 83.5066  |
| APD <sub>90</sub> (ms) | 185.34   | 148.88    | 97.8698  |
| APD <sub>99</sub> (ms) | 212.22   | 174.183   | 105.082  |

**Table S1.** Main parameters of AP waveforms. Diastolic potential ( $E_{diast}$ ); peak amplitude of AP (PA) and action potential duration (APD) at different % of repolarization.
